# Supplementary material for: Preparation and Evaluation of Undaria pinnatifida Nanocellulose in Fabricating Pickering Emulsions for Protection of Astaxanthin
Source: MDPI journal article supplement (doi:10.3390/foods11060876), 2022-03-18
Supplement: s1 [file s1]

Supplementary data

# Preparation and Evaluation of *Undaria pinnatifida* Nanocellulose in Fabricating Pickering Emulsions for Protection of Astaxanthin

Yu Li <sup>1,2,3</sup>, Siyuan Fei <sup>1,2,3</sup>, Deyang Yu <sup>1,2,3</sup>, Lijuan Zhang <sup>1,2,3</sup>, Jiaxuan Li <sup>1,2,3</sup>, Ronggang Liu <sup>1,2,3</sup> and Mingqian Tan <sup>1,2,3,\*</sup>

<sup>1</sup> Academy of Food Interdisciplinary Science, School of Food Science and Technology, Dalian Polytechnic University, Qinggongyuan 1, Ganjingzi District, Dalian 116034, China; liyu06190908@163.com (Y.L.); 13470319363@163.com (S.F.); yudy0411@163.com (D.Y.); zhanglijuan202202@163.com (L.Z.); nancylee98@126.com (J.L.); lrg19950427@163.com (R.L.)

<sup>2</sup> National Engineering Research Center of Seafood, Dalian Polytechnic University, Dalian 116034, China

<sup>3</sup> Collaborative Innovation Center of Seafood Deep Processing, Dalian Polytechnic University, Dalian 116034, China

\* Correspondence: mqtan@dlpu.edu.cn; Tel.: +86-411-8631-8657

**Table S1.** Yield, length, diameter and aspect ratio of U-cellulose, CNFs and TOCNFs.

| Sample                | U-cellulose                | CNFs                          | TOCNFs                      |
|-----------------------|----------------------------|-------------------------------|-----------------------------|
| Yield (%)             | 56.80 ± 7.42 <sup>ab</sup> | 54.33 ± 6.03 <sup>b</sup>     | 68.16 ± 4.43 <sup>a</sup>   |
| Average length (nm)   | -                          | 1036.95 ± 111.89 <sup>a</sup> | 773.52 ± 91.81 <sup>b</sup> |
| Average diameter (nm) | 47.01 ± 11.85 <sup>a</sup> | 26.22 ± 5.02 <sup>b</sup>     | 13.52 ± 3.30 <sup>b</sup>   |
| Aspect ratio          | -                          | 39.98 ± 3.45 <sup>b</sup>     | 56.79 ± 8.59 <sup>a</sup>   |

Different superscript letters represent significant difference ( $p < 0.05$ ).

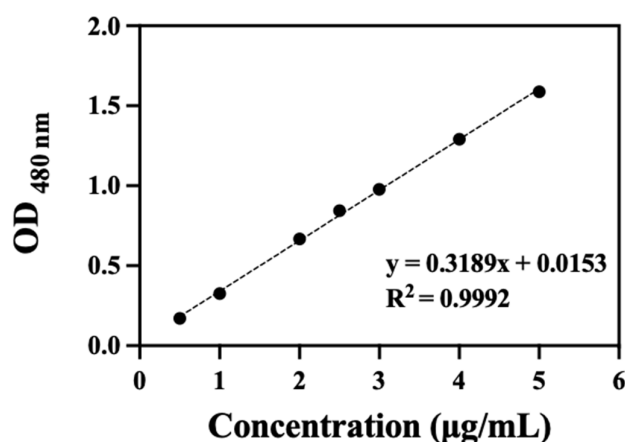

**Figure S1.** The standard curve of AXT.

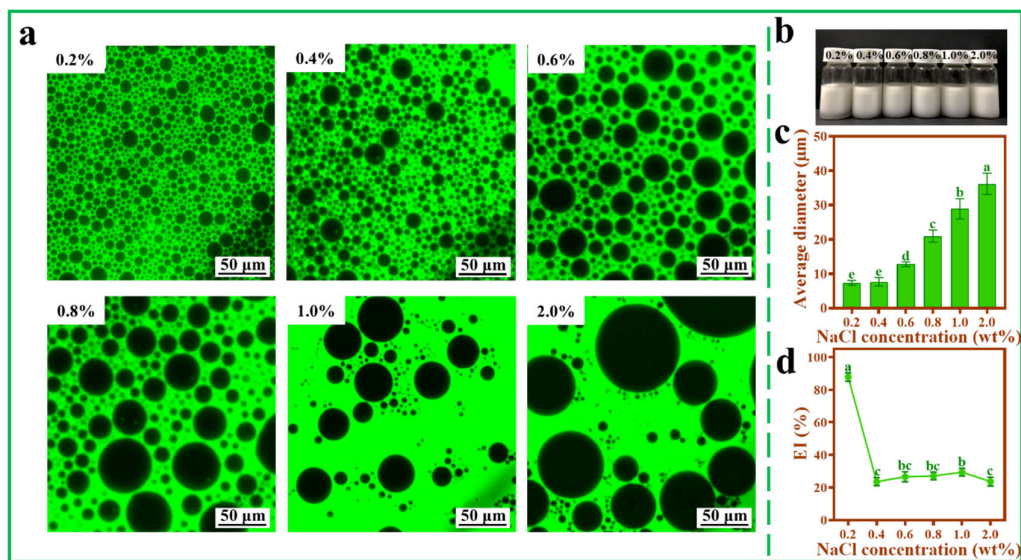

**Figure S2.** Inverted fluorescence microscopy images (a), photograph (b), average diameter (c) and EI% (d) of Pickering emulsions at different NaCl concentrations (0.20 wt%, 0.40 wt%, 0.60 wt%, 0.80 wt%, 1.0 wt% and 2.0 wt%;  $\omega_{(TOCNFs)}$  = 0.9 wt%, pH = 4, 450 W).

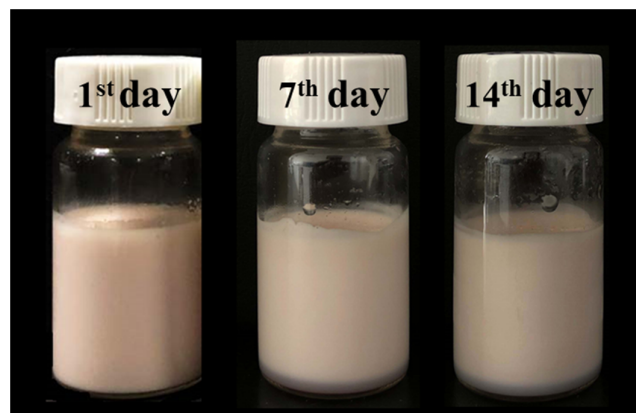

**Figure S3.** Photographs of AXT-loaded Pickering emulsions stored for 1 day, 7 days and 14 days.
